# Supplementary material
Source: publisher figshare collection journal article supplement (https://frontiersin.figshare.com/ndownloader/files/18599408)
Supplement: Supplementary file 1 [file 18599408]

Supplementary Material

# Supplementary Figures and Tables

**Table S1.** Contrasts among vital rates for *Koeleria macrantha*. Pr(negative) represents the probability that the effect of Treatment 1 < Treatment 2, whereas Pr(positive) is the probability that the effect of Treatment 1 > Treatment 2 (and is equal to 1 - Pr(negative))

| **Vital Rate** | **Elevation** | **Treatment 1** | **Treatment 2** | **Pr(negative)** | **Pr(positive)** |
| --- | --- | --- | --- | --- | --- |
| *Growth* | 3200 | Herb | Herb removal | 0.54 | 0.46 |
|  |  | Herb | Shrub | 0.16 | 0.84 |
|  |  | Herb | Shrub removal | 0.08 | 0.92 |
|  |  | Herb removal | Shrub | 0.13 | 0.87 |
|  |  | Herb removal | Shrub removal | 0.07 | 0.94 |
|  |  | Shrub | Shrub removal | 0.33 | 0.67 |
|  | 3500 | Herb | Herb removal | 0.72 | 0.28 |
|  |  | Herb | Shrub | 0.47 | 0.53 |
|  |  | Herb | Shrub removal | 0.30 | 0.70 |
|  |  | Herb removal | Shrub | 0.25 | 0.75 |
|  |  | Herb removal | Shrub removal | 0.14 | 0.86 |
|  |  | Shrub | Shrub removal | 0.32 | 0.68 |
|  | 3800 | Herb | Herb removal | 0.58 | 0.42 |
|  |  | Herb | Shrub | 0.17 | 0.83 |
|  |  | Herb | Shrub removal | 0.10 | 0.90 |
|  |  | Herb removal | Shrub | 0.11 | 0.89 |
|  |  | Herb removal | Shrub removal | 0.06 | 0.94 |
|  |  | Shrub | Shrub removal | 0.36 | 0.64 |
| *Survival* | 3200 | Herb | Herb removal | 0.04 | 0.96 |
|  |  | Herb | Shrub | 0.22 | 0.78 |
|  |  | Herb | Shrub removal | 0.17 | 0.83 |
|  |  | Herb removal | Shrub | 0.81 | 0.19 |
|  |  | Herb removal | Shrub removal | 0.80 | 0.20 |
|  |  | Shrub | Shrub removal | 0.45 | 0.55 |
|  | 3500 | Herb | Herb removal | 0.77 | 0.23 |
|  |  | Herb | Shrub | 0.63 | 0.37 |
|  |  | Herb | Shrub removal | 0.68 | 0.32 |
|  |  | Herb removal | Shrub | 0.28 | 0.72 |
|  |  | Herb removal | Shrub removal | 0.31 | 0.69 |
|  |  | Shrub | Shrub removal | 0.56 | 0.44 |
|  | 3800 | Herb | Herb removal | 0.05 | 0.95 |
|  |  | Herb | Shrub | 0.23 | 0.77 |
|  |  | Herb | Shrub removal | 0.11 | 0.89 |
|  |  | Herb removal | Shrub | 0.84 | 0.16 |
|  |  | Herb removal | Shrub removal | 0.65 | 0.35 |
|  |  | Shrub | Shrub removal | 0.27 | 0.73 |
| *Flowering* | 3200 | Herb | Herb removal | 0.85 | 0.15 |
|  |  | Herb | Shrub | 0.59 | 0.41 |
|  |  | Herb | Shrub removal | 0.42 | 0.58 |
|  |  | Herb removal | Shrub | 0.24 | 0.76 |
|  |  | Herb removal | Shrub removal | 0.12 | 0.88 |
|  |  | Shrub | Shrub removal | 0.35 | 0.65 |
|  | 3500 | Herb | Herb removal | 0.84 | 0.16 |
|  |  | Herb | Shrub | 0.81 | 0.20 |
|  |  | Herb | Shrub removal | 0.80 | 0.20 |
|  |  | Herb removal | Shrub | 0.43 | 0.57 |
|  |  | Herb removal | Shrub removal | 0.43 | 0.57 |
|  |  | Shrub | Shrub removal | 0.48 | 0.52 |
|  | 3800 | Herb | Herb removal | 0.13 | 0.87 |
|  |  | Herb | Shrub | 0.01 | 0.99 |
|  |  | Herb | Shrub removal | 0.05 | 0.95 |
|  |  | Herb removal | Shrub | 0.06 | 0.94 |
|  |  | Herb removal | Shrub removal | 0.29 | 0.71 |
|  |  | Shrub | Shrub removal | 0.82 | 0.18 |
| *Seeds* | 3200 | Herb | Herb removal | 0.74 | 0.26 |
|  |  | Herb | Shrub | 0.08 | 0.92 |
|  |  | Herb | Shrub removal | 0.71 | 0.29 |
|  |  | Herb removal | Shrub | 0.02 | 0.98 |
|  |  | Herb removal | Shrub removal | 0.51 | 0.49 |
|  |  | Shrub | Shrub removal | 0.98 | 0.02 |
|  | 3500 | Herb | Herb removal | 0.40 | 0.60 |
|  |  | Herb | Shrub | 0.70 | 0.30 |
|  |  | Herb | Shrub removal | 0.54 | 0.47 |
|  |  | Herb removal | Shrub | 0.80 | 0.20 |
|  |  | Herb removal | Shrub removal | 0.64 | 0.36 |
|  |  | Shrub | Shrub removal | 0.32 | 0.68 |
|  | 3800 | Herb | Herb removal | 0.23 | 0.77 |
|  |  | Herb | Shrub | 0.00 | 1.00 |
|  |  | Herb | Shrub removal | 0.01 | 0.99 |
|  |  | Herb removal | Shrub | 0.00 | 1.00 |
|  |  | Herb removal | Shrub removal | 0.03 | 0.97 |
|  |  | Shrub | Shrub removal | 0.86 | 0.14 |

**Table S2.** Contrasts among vital rates for *Eriogonum ovalifolium*. Pr(negative) represents the probability that the effect of Treatment 1 < Treatment 2, whereas Pr(positive) is the probability that the effect of Treatment 1 > Treatment 2 (and is equal to 1 - Pr(negative))

| **Vital Rate** | **Elevation** | **Treatment 1** | **Treatment 2** | **Pr(negative)** | **Pr(positive)** |
| --- | --- | --- | --- | --- | --- |
| *Growth* | 3200 | Herb | Herb removal | 0.35 | 0.65 |
|  |  | Herb | Shrub | 0.38 | 0.62 |
|  |  | Herb | Shrub removal | 0.41 | 0.59 |
|  |  | Herb removal | Shrub | 0.51 | 0.49 |
|  |  | Herb removal | Shrub removal | 0.55 | 0.45 |
|  |  | Shrub | Shrub removal | 0.55 | 0.45 |
|  | 3500 | Herb | Herb removal | 0.15 | 0.85 |
|  |  | Herb | Shrub | 0.13 | 0.87 |
|  |  | Herb | Shrub removal | 0.12 | 0.88 |
|  |  | Herb removal | Shrub | 0.40 | 0.60 |
|  |  | Herb removal | Shrub removal | 0.40 | 0.60 |
|  |  | Shrub | Shrub removal | 0.50 | 0.50 |
|  | 3800 | Herb | Herb removal | 0.05 | 0.95 |
|  |  | Herb | Shrub | 0.00 | 1.00 |
|  |  | Herb | Shrub removal | 0.00 | 1.00 |
|  |  | Herb removal | Shrub | 0.00 | 1.00 |
|  |  | Herb removal | Shrub removal | 0.00 | 1.00 |
|  |  | Shrub | Shrub removal | 0.23 | 0.77 |
| *Survival* | 3200 | Herb | Herb removal | 0.80 | 0.20 |
|  |  | Herb | Shrub | 0.96 | 0.04 |
|  |  | Herb | Shrub removal | 0.91 | 0.09 |
|  |  | Herb removal | Shrub | 0.88 | 0.12 |
|  |  | Herb removal | Shrub removal | 0.75 | 0.25 |
|  |  | Shrub | Shrub removal | 0.27 | 0.73 |
|  | 3500 | Herb | Herb removal | 0.66 | 0.34 |
|  |  | Herb | Shrub | 0.91 | 0.09 |
|  |  | Herb | Shrub removal | 0.70 | 0.30 |
|  |  | Herb removal | Shrub | 0.86 | 0.14 |
|  |  | Herb removal | Shrub removal | 0.56 | 0.44 |
|  |  | Shrub | Shrub removal | 0.16 | 0.84 |
|  | 3800 | Herb | Herb removal | 0.22 | 0.78 |
|  |  | Herb | Shrub | 0.16 | 0.84 |
|  |  | Herb | Shrub removal | 0.09 | 0.91 |
|  |  | Herb removal | Shrub | 0.39 | 0.61 |
|  |  | Herb removal | Shrub removal | 0.21 | 0.79 |
|  |  | Shrub | Shrub removal | 0.27 | 0.73 |
| *Flowering* | 3200 | Herb | Herb removal | 0.34 | 0.66 |
|  |  | Herb | Shrub | 0.33 | 0.67 |
|  |  | Herb | Shrub removal | 0.52 | 0.48 |
|  |  | Herb removal | Shrub | 0.48 | 0.52 |
|  |  | Herb removal | Shrub removal | 0.66 | 0.34 |
|  |  | Shrub | Shrub removal | 0.69 | 0.31 |
|  | 3500 | Herb | Herb removal | 0.04 | 0.96 |
|  |  | Herb | Shrub | 0.00 | 1.00 |
|  |  | Herb | Shrub removal | 0.01 | 0.99 |
|  |  | Herb removal | Shrub | 0.12 | 0.88 |
|  |  | Herb removal | Shrub removal | 0.29 | 0.71 |
|  |  | Shrub | Shrub removal | 0.74 | 0.26 |
|  | 3800 | Herb | Herb removal | 0.15 | 0.85 |
|  |  | Herb | Shrub | 0.00 | 1.00 |
|  |  | Herb | Shrub removal | 0.00 | 1.00 |
|  |  | Herb removal | Shrub | 0.00 | 1.00 |
|  |  | Herb removal | Shrub removal | 0.00 | 1.00 |
|  |  | Shrub | Shrub removal | 0.31 | 0.69 |
| *Seeds* | 3200 | Herb | Herb removal | 0.56 | 0.44 |
|  |  | Herb | Shrub | 0.03 | 0.97 |
|  |  | Herb | Shrub removal | 0.47 | 0.53 |
|  |  | Herb removal | Shrub | 0.04 | 0.96 |
|  |  | Herb removal | Shrub removal | 0.42 | 0.58 |
|  |  | Shrub | Shrub removal | 0.95 | 0.05 |
|  | 3500 | Herb | Herb removal | 0.83 | 0.17 |
|  |  | Herb | Shrub | 0.06 | 0.94 |
|  |  | Herb | Shrub removal | 0.57 | 0.43 |
|  |  | Herb removal | Shrub | 0.01 | 0.99 |
|  |  | Herb removal | Shrub removal | 0.24 | 0.76 |
|  |  | Shrub | Shrub removal | 0.93 | 0.07 |
|  | 3800 | Herb | Herb removal | 0.92 | 0.08 |
|  |  | Herb | Shrub | 0.04 | 0.96 |
|  |  | Herb | Shrub removal | 0.60 | 0.40 |
|  |  | Herb removal | Shrub | 0.00 | 1.00 |
|  |  | Herb removal | Shrub removal | 0.20 | 0.80 |
|  |  | Shrub | Shrub removal | 0.96 | 0.04 |

**Figure S1.** Plot treatment effects on growth, survival, flowering, and seed production for *K. macrantha*. Raw data is shown in the top row plotted by elevation (m) on the x-axis and by plot treatments denoted by colors. Modeled demographic rates are shown in the bottom three rows and plotted separately for each elevation with individual plant size (Ln(z)) on the x-axis and colored lines denoting plot treatments.

**Figure S2.** Plot treatment effects on growth, survival, flowering, and seed production for *E.ovalifolium*. Raw data is shown in the top row plotted by elevation (m) on the x-axis and by plot treatments denoted by colors. Modeled demographic rates are shown in the bottom three rows and plotted separately for each elevation with individual plant size (Ln(z)) on the x-axis and colored lines denoting plot treatments.

**Figure S3.** Example of the effects of using a partial pooling model. A) Raw data for survival rates for *K. macrantha* in each treatment and elevation. B) Predictions from the ‘no pooling’ model that includes an interaction term between elevation and treatment but with no pooling among them. C) The ‘partial pooling’ model allows sharing of information among elevations within each treatments. Shown here are only the models for the high elevation site, as an example. This comparison highlights the particular consequential example for predicting survival when there is no observed mortality. In the Herb treatment at 3800m there is no observed mortality (A). The ‘no pooling’ model therefore predicts very high survival rates within the Herb treatment (B). In contrast, the ‘partial pooling’ model’s estimate of Herb survival is ‘pulled’ downward toward the values observed at the other elevations (C). We suggest that this is a more realistic way to model variation in vital rates for uncommon life history events such as mortality of long-lived adult plants. The estimates of other rates also exhibit the effects of partial pooling, but are these effects are more subtle because they had observed mortality events. This approach may be of general use for studies trying to understand the consequences of plant-soil feedbacks in field settings. The influence of partial pooling will decline as the size of the dataset increases (Qian et al. 2010).

Qian, S.S., Cuffney, T.F., Alameddine, I., McMahon, G. & Reckhow, K.H. (2010). On the application of multilevel modeling in environmental and ecological studies. *Ecology*, 91, 355–361.

**Survival *K. macrantha***

**Survival *E. ovalifolium***

**Figure S4.** Elasticity analyses for survival *K. macrantha* (top) and *E. ovalifolium* (bottom). Line colors indicate different plot treatments. Elasticities are plotted as function of individual plant size (Ln(z)) and by elevation.

**Growth *K. macrantha***

**Growth *E. ovalifolium***

**Fig S5.** Contour plots of elasticity analyses for growth of *K. macrantha* (first) and *E. ovalifolium* (second). Contour lines show elasticity values at each size transition and colors shift from grey to white as elasticity increases.

**
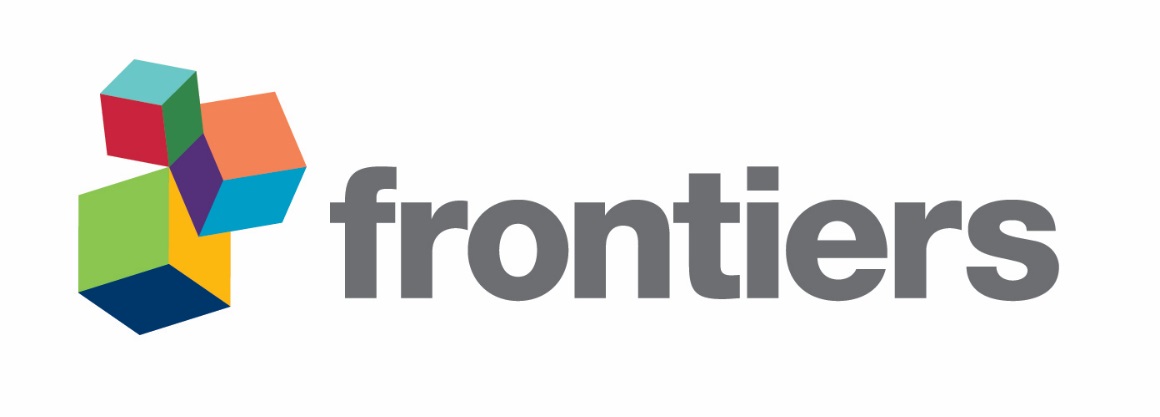
**
